# Supplementary material for: As(III, V) Uptake from Nanostructured Iron Oxides and Oxyhydroxides: The Complex Interplay between Sorbent Surface Chemistry and Arsenic Equilibria
Source: MDPI journal article supplement (doi:10.3390/nano12030326), 2022-01-20
Supplement: s1 [file s1]

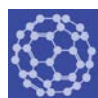

## Supplementary Material

# As(III, V) Uptake from Nanostructured Iron Oxides and Oxyhydroxides: The Complex Interplay between Sorbent Surface Chemistry and Arsenic Equilibria

Marco Sanna Angotzi <sup>1,2</sup>, Valentina Mameli <sup>1,2,\*</sup>, Alessandra Fantasia <sup>1</sup>, Claudio Cara <sup>1,2</sup>, Fausto Secci <sup>1,2</sup>, Stefano Enzo <sup>3</sup>, Marianna Gerina <sup>4</sup> and Carla Cannas <sup>1,2</sup>

<sup>1</sup> Department of Chemical and Geological Sciences, University of Cagliari, S.S. 554 bivio per Sestu, 09042 Monserrato, Italy; marcosanna@unica.it (M.S.A.); fantasia.91@hotmail.it (A.F.); cara.claudio16@gmail.com (C.C.); fausto.s1993@gmail.com (F.S.); ccannas@unica.it (C.C.)

<sup>2</sup> Consorzio Interuniversitario Nazionale per la Scienza e Tecnologia dei Materiali (INSTM), Via Giuseppe Giusti 9, 50121 Firenze, Italy

<sup>3</sup> Department of Chemistry and Pharmacy, University of Sassari, Via Vienna 2, 07100 Sassari, Italy; enzo@uniss.it

<sup>4</sup> Department of Inorganic Chemistry, Charles University, Hlavova 8, 12800 Prague 2, Czech Republic; marygerina@hotmail.it

\* Correspondence: valentina.mameli@unica.it

**Citation:** Sanna Angotzi, M.; Mameli, V.; Fantasia, A.; Cara, C.; Secci, F.; Enzo, S.; Gerina, M.; Cannas, C. As(III, V) Uptake from Nanostructured Iron Oxides and Oxyhydroxides: The Complex Interplay between Sorbent Surface Chemistry and Arsenic Equilibria. *Nanomaterials* **2022**, *12*, x. <https://doi.org/10.3390/xxxxx>

Academic Editor(s): Zheng Ling

Received: 17 December 2021

Accepted: 18 January 2022

Published: date

**Publisher's Note:** MDPI stays neutral with regard to jurisdictional claims in published maps and institutional affiliations.

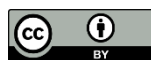

**Copyright:** © 2022 by the authors. Submitted for possible open access publication under the terms and conditions of the Creative Commons Attribution (CC BY) license (<https://creativecommons.org/licenses/by/4.0/>).

## Table of Contents

|                                                                  |    |
|------------------------------------------------------------------|----|
| 1. Experimental Details                                          | 2  |
| 2. Characterization of the sorbents                              | 2  |
| 3. Theoretical behaviour of the sorbents and the arsenic species | 6  |
| 4. Adsorption tests: effect of pH As <sup>V</sup>                | 8  |
| 5. Adsorption tests: effect of pH As <sup>III</sup>              | 13 |
| 6. FTIR Spectra                                                  | 17 |
| 7. Adsorption tests: effect of initial concentration             | 18 |
| 8. Adsorption tests: effect of contact time                      | 19 |
| 9. Adsorption tests: effect of ionic strength                    | 21 |
| 10. Adsorption tests: effect of competitors                      | 22 |

## 1. Experimental Details

**Table S1.** Experimental parameters for adsorption tests. The sorbent amount was 50 mg and solution volume 20 mL for all the tests.

| Sorb.                  | Effect         | C <sub>0</sub> As <sup>V</sup><br>(mg L <sup>-1</sup> ) | C <sub>0</sub> As <sup>III</sup><br>(mg L <sup>-1</sup> ) | t (min)                      | pH <sub>0</sub>  | NaCl (M)           | As/Comp<br>(mol/mol) |
|------------------------|----------------|---------------------------------------------------------|-----------------------------------------------------------|------------------------------|------------------|--------------------|----------------------|
| Aka, Fer, Mag,<br>Comp | pH             | 100                                                     | 0                                                         | 960                          | 2, 3, 4, 6,<br>8 | 0                  | 0                    |
| Aka, Fer, Mag,<br>Comp | pH             | 0                                                       | 100                                                       | 960                          | 2, 3, 4, 6,<br>8 | 0                  | 0                    |
| Aka, Fer               | pH             | 500                                                     | 0                                                         | 960                          | 2, 3, 4, 6,<br>8 | 0                  | 0                    |
| Aka, Fer               | pH             | 0                                                       | 500                                                       | 960                          | 2                | 0                  | 0                    |
| Aka                    | C <sub>0</sub> | 10, 50, 100, 150, 200,<br>250, 350, 500                 | 0                                                         | 960                          | 3, 8             | 0                  | 0                    |
| Aka                    | Time           | 250                                                     | 0                                                         | 10, 30, 60, 120,<br>240, 960 | 3, 8             | 0                  | 0                    |
| Aka                    | Ionic Strength | 250                                                     | 0                                                         | 960                          | 3, 8             | 0, 0.01, 0.1,<br>1 | 0                    |
| Aka                    | Competitor     | 250                                                     | 0                                                         | 960                          | 3, 8             | 0                  | 1:1, 1:10, 1:100     |

Sorbent name, studied effect, initial concentration (C<sub>0</sub>), contact time, initial pH (pH<sub>0</sub>), ionic strength concentration (NaCl), arsenic/competitor ratio (SO<sub>4</sub><sup>2-</sup>, PO<sub>4</sub><sup>3-</sup>).

## 2. Characterization of the sorbents

**Table S2.** Hyperfine parameters obtained by fitting procedure of the <sup>57</sup>Fe Mössbauer spectra of the sorbents.

| Sample               | Subspectrum | IS<br>(mm s <sup>-1</sup> ) | QS<br>(mm s <sup>-1</sup> ) | B <sub>HF</sub><br>(T) | W<br>(mm s <sup>-1</sup> ) | D         | A<br>(%) |
|----------------------|-------------|-----------------------------|-----------------------------|------------------------|----------------------------|-----------|----------|
| Aka                  | Doublet     | 0.373(1)                    | 0.536(7)                    | -                      | 0.330(7)                   | 0.095(4)  | 57       |
|                      | Doublet     | 0.379(2)                    | 0.940(9)                    | -                      | 0.346(8)                   | 0.071(4)  | 43       |
| Fer<br>(1st attempt) | Doublet     | 0.338(2)                    | 0.697(4)                    | -                      | 0.615(6)                   | 0.1977(9) | -        |
| Fer<br>(2nd attempt) | Doublet     | 0.321(8)                    | 0.38(3)                     | -                      | 0.27(7)                    | 0.02(1)   | 10       |
|                      | Doublet     | 0.340(3)                    | 0.74(4)                     | -                      | 0.59(1)                    | 0.17(1)   | 88       |
|                      | Doublet     | 0.34(1)                     | 1.3(5)                      | -                      | 0.2(1)                     | 0.005(4)  | 2        |
| Mag                  | Sextet      | 0.326(2)                    | 0.007(6)                    | 47.09(3)               | 0.44(1)                    | 0.13(1)   | 50       |
|                      | Sextet      | 0.328(3)                    | -0.043(8)                   | 41.9(4)                | 0.58(2)                    | 0.13(1)   | 50       |
| Comp                 | Doublet     | 0.34(1)                     | 0.74(2)                     | -                      | 0.61(2)                    | 0.008(1)  | -        |

IS is isomer shift. QS is the quadrupole splitting, B<sub>HF</sub> is the hyperfine field; W is the width; D is the depth; A is the area.

Table S3. FTIR bands of the sorbents.

| Aka                            |                           | Mag                            |                           | Fer                            |                           | Comp                           |                           |
|--------------------------------|---------------------------|--------------------------------|---------------------------|--------------------------------|---------------------------|--------------------------------|---------------------------|
| Wavenumber (cm <sup>-1</sup> ) | Vibration mode            |
| 3300                           | $\nu$ H <sub>2</sub> O    | 3300                           | $\nu$ H <sub>2</sub> O    | 3400                           | $\nu$ H <sub>2</sub> O    | 3400                           | $\nu$ H <sub>2</sub> O    |
| 1615                           | $\delta$ H <sub>2</sub> O | 1620                           | $\delta$ H <sub>2</sub> O | 1630                           | $\delta$ H <sub>2</sub> O | 1630                           | $\delta$ H <sub>2</sub> O |
| 1360                           | $\nu$ Fe-OH               | 820                            | $\nu$ Fe-O                | 1500                           | $\nu$ Fe-OH               | 1220                           | $\nu$ Si-O-Si             |
| 1100                           | $\nu$ Fe-OH               | 630                            | $\nu$ Fe-O                | 1330                           | $\nu$ Fe-OH               | 1090                           | $\nu$ Si-O-Si             |
| 850                            | $\lambda$ OH-Cl           | 570                            | $\nu$ Fe-O                | 1065                           | $\nu$ Fe-OH               | 970                            | $\nu$ Si-O-H              |
| 680                            | $\nu_{as}$ Fe-O           |                                |                           | 850                            | $\nu$ Fe-OH               | 810                            | $\nu$ Si-O-Si             |
| 470                            | $\nu_s$ Fe-O              |                                |                           | 600                            | $\nu$ Fe-O                | 470                            | $\nu$ Fe-O                |
|                                |                           |                                |                           | 440                            | $\nu$ Fe-O                |                                |                           |

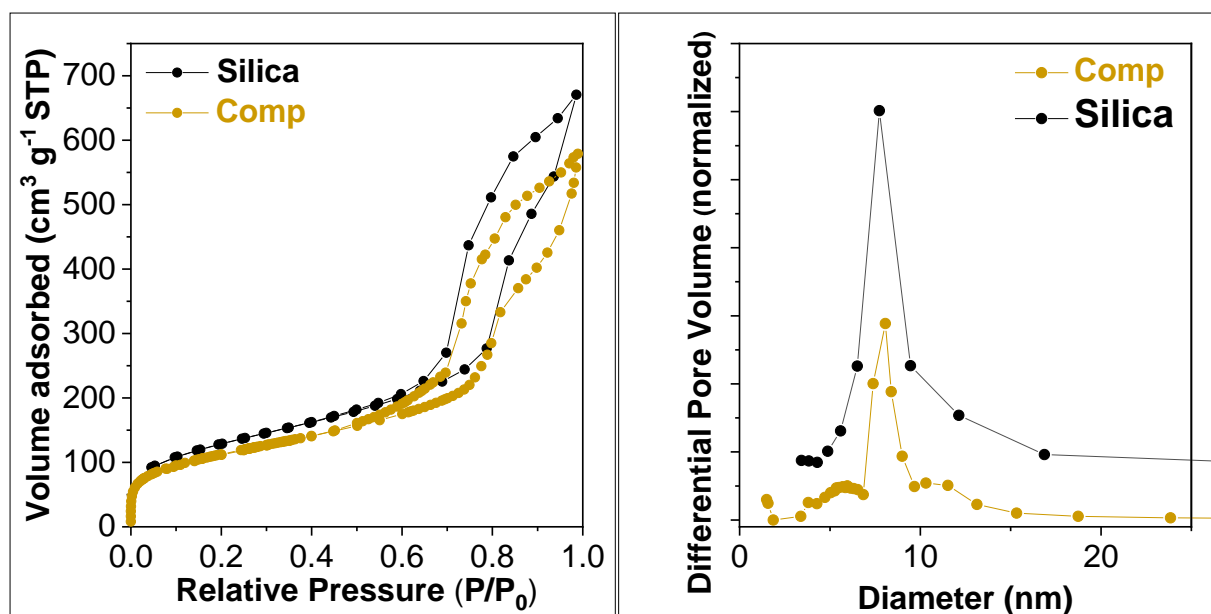Figure S1. N<sub>2</sub>-physorption isotherms (left) and BJH-calculated pore size distributions (right) of the silica-based samples.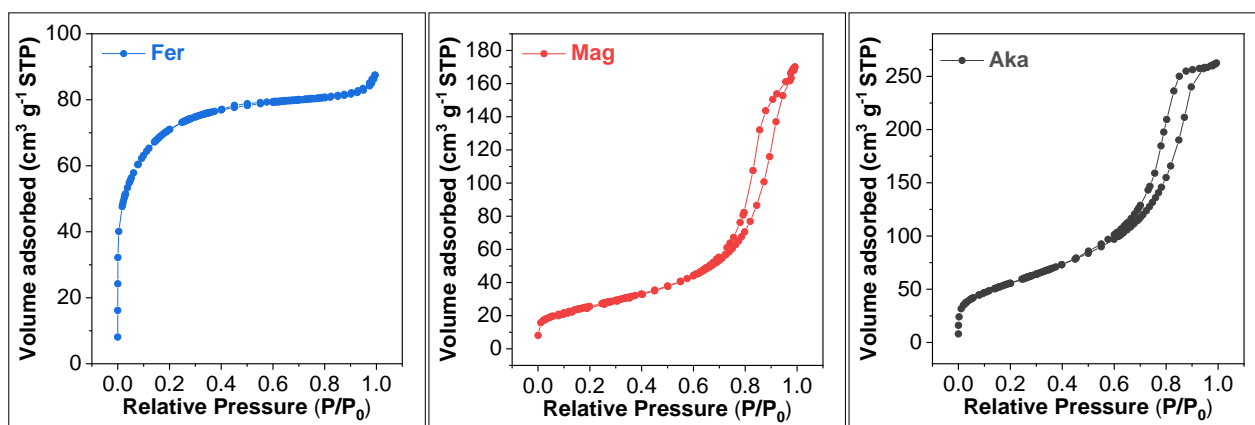Figure S2. N<sub>2</sub>-physorption isotherms of the iron oxide sorbents.

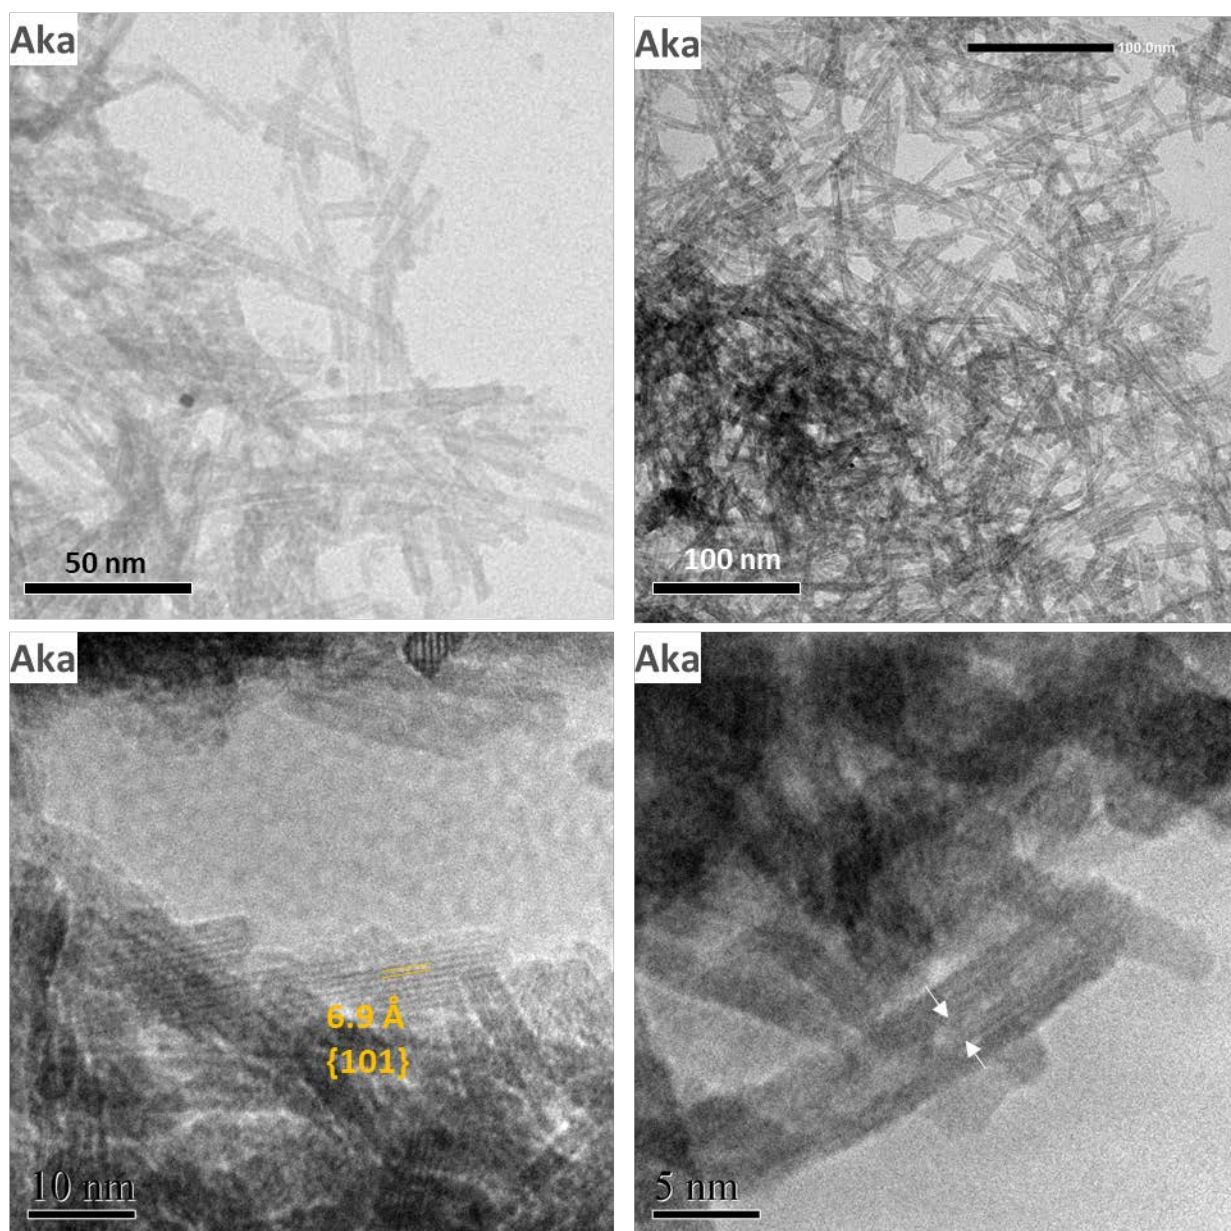

Figure S3. TEM and HRTEM micrographs of Aka nanorods.

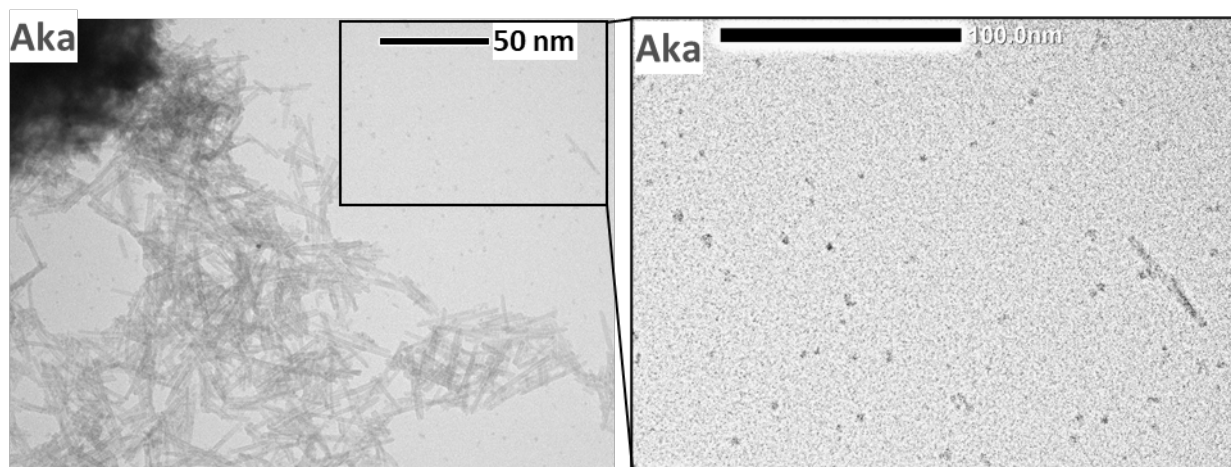

Figure S4. TEM micrograph of Aka and magnification to highlight the small nanoparticles.

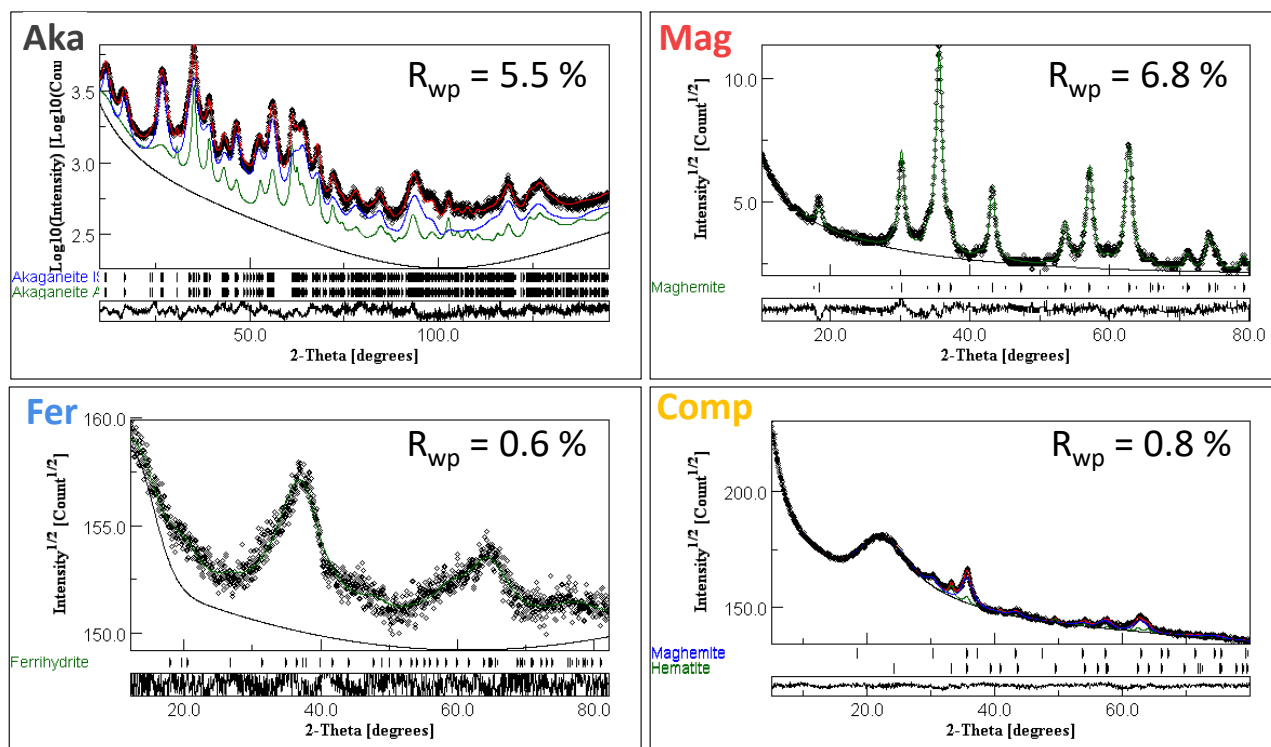

**Figure S5.** Rietveld refinement of XRD patterns of the samples. Inset of crystal shape modelled from Popa rule for the Aka sample.



### 3. Theoretical behaviour of the sorbents and the arsenic species

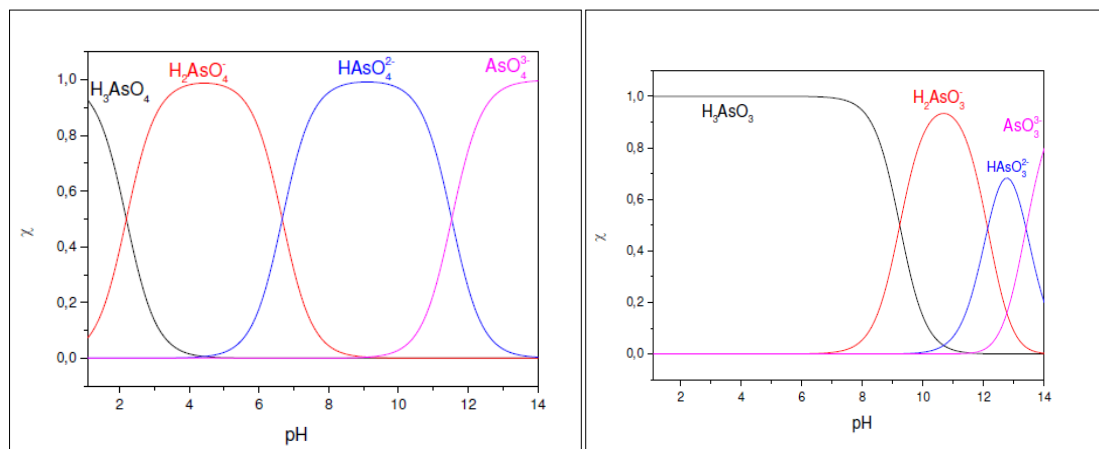

**Figure S6.** Bjerrum plot of arsenate (left) and arsenite (right) species reconstructed employing the dissociation constants of arsenic acid ( $pK_{a1} = 2.20$ ;  $pK_{a2} = 6.67$ ;  $pK_{a3} = 11.53$ ) and arsenious acid ( $pK_{a1} = 9.23$ ;  $pK_{a2} = 12.13$ ;  $pK_{a3} = 13.40$ ).

#### *Sorbent surface in water*

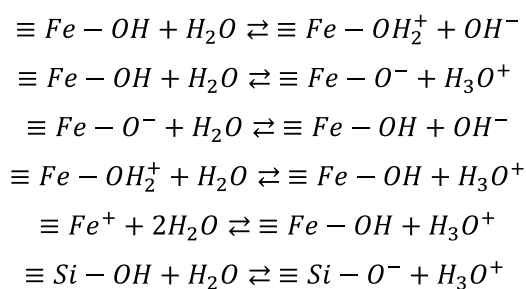

**Figure S7.** Reactions of the sorbent surface in water.

Positive surface of sorbent with  $As^V$  species (Bidentate Binuclear):  $2\equiv Fe-OH_2^+ + H_2O \rightleftharpoons$

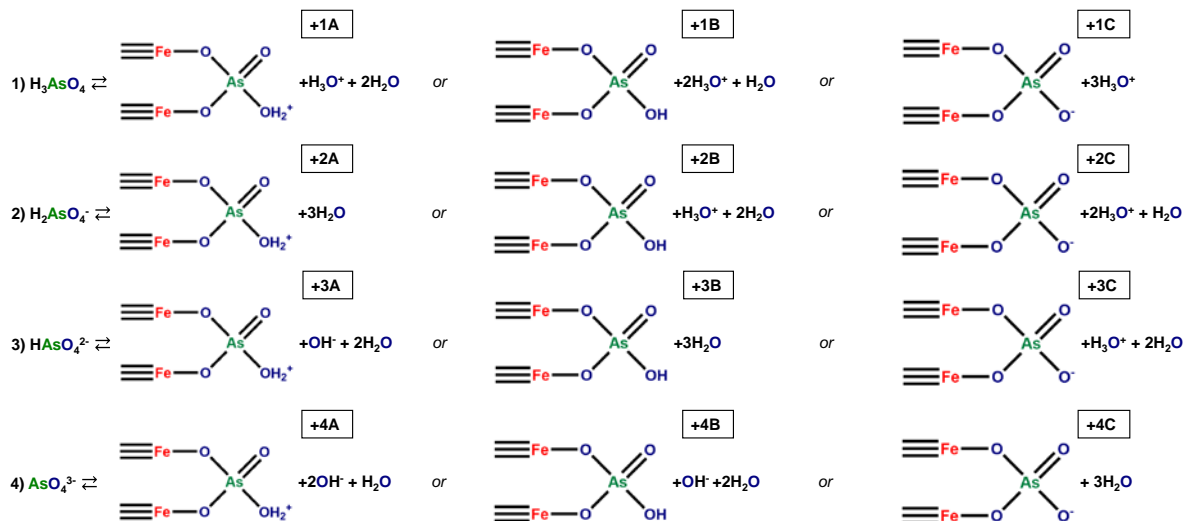

Neutral surface of sorbent with  $As^V$  species (Bidentate Binuclear):  $2\equiv Fe-OH + 2H_2O \rightleftharpoons$

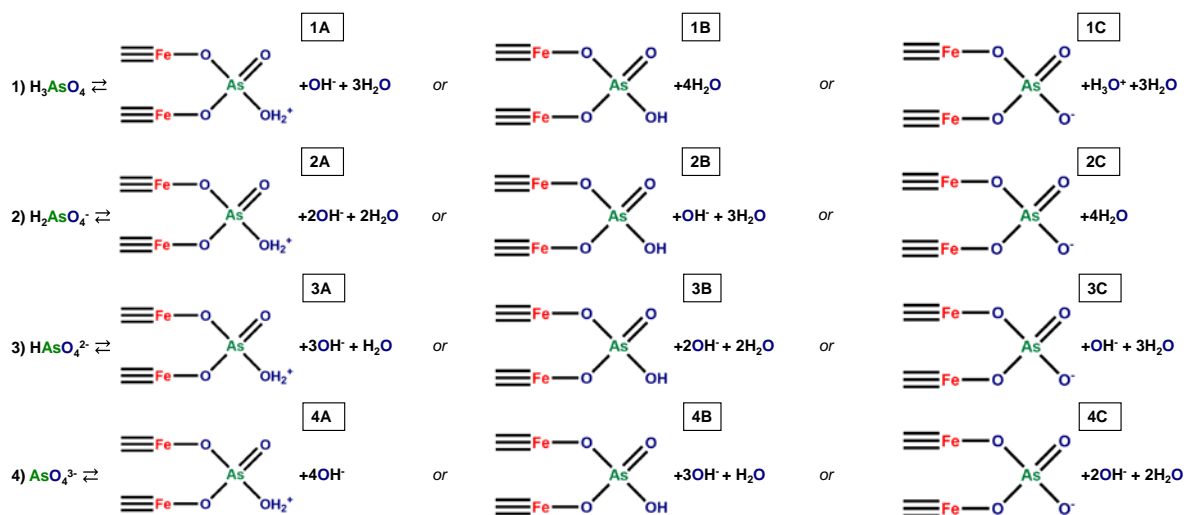

Negative surface of sorbent with  $As^V$  species (Bidentate Binuclear):  $2\equiv Fe-O^- + 4H_2O \rightleftharpoons$

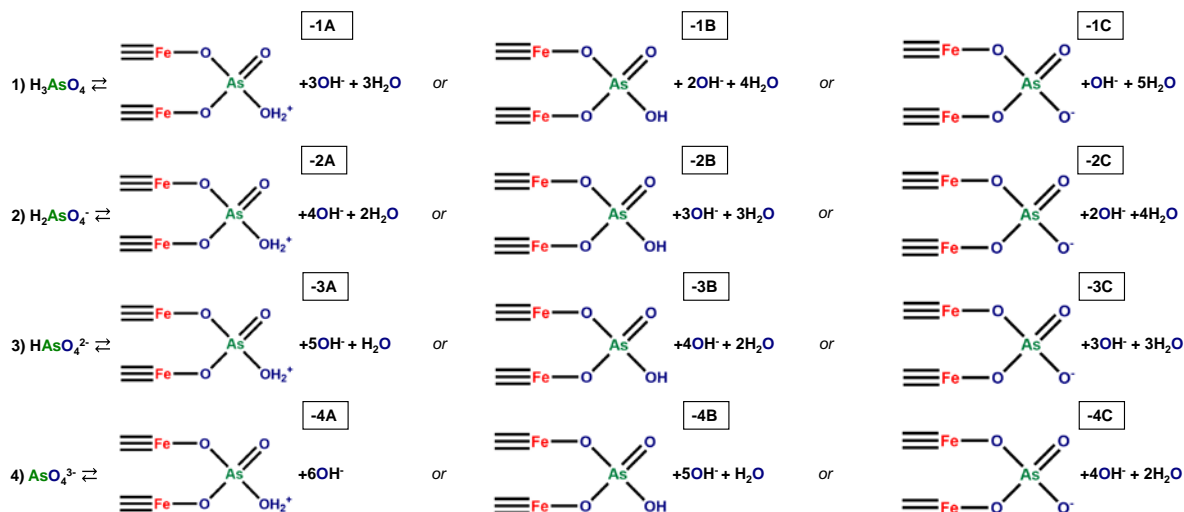

Figure S8. Possible reactions between the sorbent surface and arsenate species in water.

#### 4. Adsorption tests: effect of pH As<sup>V</sup>

**Table S4.** Batch experiments results of the sorbents at initial concentration of 100 or 500 mg L<sup>-1</sup> of As<sup>V</sup> at various pH. Volume of the contaminant was 20 mL and adsorption time was 16 hours.

| Sorbent | Moisture (%) | m (mg) | V (mL) | pH <sub>0</sub> | pH <sub>Int</sub> | pH <sub>Fin</sub> | C <sub>0</sub> (mg L <sup>-1</sup> ) | C <sub>e</sub> As <sup>V</sup> (mg L <sup>-1</sup> ) | q <sub>e</sub> (mg/g) | As Ads (%) | q <sub>e</sub> (mg/m <sup>2</sup> ) | C <sub>e</sub> Si (mg L <sup>-1</sup> ) |
|---------|--------------|--------|--------|-----------------|-------------------|-------------------|--------------------------------------|------------------------------------------------------|-----------------------|------------|-------------------------------------|-----------------------------------------|
| Aka     | 7.24%        | 51.6   | 20     | 2.11            | 1.88              | 2.06              | 97.9                                 | 0.2                                                  | 40.8                  | 99.8%      | 0.202                               | <i>n.a.</i>                             |
|         |              | 49.2   | 20     | 2.93            | 2.65              | 2.61              | 95.5                                 | 0.2                                                  | 41.8                  | 99.8%      | 0.207                               | <i>n.a.</i>                             |
|         |              | 51.5   | 20     | 3.97            | 2.81              | 2.64              | 96.5                                 | 0.1                                                  | 40.3                  | 99.9%      | 0.200                               | <i>n.a.</i>                             |
|         |              | 51.2   | 20     | 6.14            | 3.07              | 2.81              | 96.7                                 | 0.1                                                  | 40.7                  | 99.9%      | 0.201                               | <i>n.a.</i>                             |
|         |              | 49.8   | 20     | 8.06            | 5.76              | 3.99              | 98.4                                 | 0.8                                                  | 42.3                  | 99.2%      | 0.209                               | <i>n.a.</i>                             |
|         |              | 49.8   | 20     | 2.15            | 1.90              | 1.81              | 459.0                                | 258.3                                                | 86.9                  | 43.7%      | 0.430                               | <i>n.a.</i>                             |
|         |              | 50.9   | 20     | 3.17            | 2.91              | 3.27              | 469.9                                | 281.5                                                | 79.8                  | 40.1%      | 0.395                               | <i>n.a.</i>                             |
|         |              | 49.8   | 20     | 3.05            | 2.89              | 2.82              | 484.2                                | 279.7                                                | 88.5                  | 42.2%      | 0.438                               | <i>n.a.</i>                             |
|         |              | 50.9   | 20     | 3.94            | 3.25              | 3.39              | 481.9                                | 290.2                                                | 81.2                  | 39.8%      | 0.402                               | <i>n.a.</i>                             |
|         |              | 50.9   | 20     | 6.16            | 6.28              | 6.41              | 481.2                                | 339.3                                                | 60.1                  | 29.5%      | 0.298                               | <i>n.a.</i>                             |
|         |              | 50.3   | 20     | 8.21            | 7.68              | 7.35              | 455.3                                | 335.1                                                | 51.5                  | 26.4%      | 0.255                               | <i>n.a.</i>                             |
| Fer     | 10.67%       | 45.5   | 20     | 2.09            | 2.15              | 2.05              | 104.7                                | 0.4                                                  | 45.9                  | 99.7%      | 0.176                               | <i>n.a.</i>                             |
|         |              | 44.6   | 20     | 2.94            | 3.55              | 4.77              | 105.1                                | 6.5                                                  | 44.2                  | 93.8%      | 0.170                               | <i>n.a.</i>                             |
|         |              | 45.3   | 20     | 3.98            | 6.46              | 7.03              | 105.8                                | 46.2                                                 | 26.3                  | 56.3%      | 0.101                               | <i>n.a.</i>                             |
|         |              | 45.3   | 20     | 6.04            | 6.82              | 7.20              | 106.1                                | 52.9                                                 | 23.5                  | 50.1%      | 0.090                               | <i>n.a.</i>                             |
|         |              | 45.3   | 20     | 8.02            | 8.28              | 8.40              | 105.0                                | 80.9                                                 | 10.6                  | 22.9%      | 0.041                               | <i>n.a.</i>                             |
|         |              | 44.8   | 20     | 2.09            | 2.24              | 1.96              | 512.6                                | 353.4                                                | 71.0                  | 31.1%      | 0.273                               | <i>n.a.</i>                             |
|         |              | 45.0   | 20     | 3.05            | 3.32              | 4.33              | 518.5                                | 379.4                                                | 61.9                  | 26.8%      | 0.238                               | <i>n.a.</i>                             |
|         |              | 44.7   | 20     | 4.00            | 5.61              | 6.08              | 517.6                                | 409.9                                                | 48.1                  | 20.8%      | 0.185                               | <i>n.a.</i>                             |
|         |              | 45.3   | 20     | 5.96            | 6.15              | 6.28              | 520.7                                | 414.7                                                | 46.8                  | 20.4%      | 0.180                               | <i>n.a.</i>                             |
|         |              | 45.2   | 20     | 8.07            | 8.23              | 8.26              | 516.6                                | 464.0                                                | 23.3                  | 10.2%      | 0.089                               | <i>n.a.</i>                             |
| Mag     | 1.31%        | 49.9   | 20     | 2.22            | 2.18              | 2.20              | 92.3                                 | 29.1                                                 | 25.7                  | 68.5%      | 0.279                               | <i>n.a.</i>                             |
|         |              | 51.3   | 20     | 3.19            | 3.53              | 3.73              | 93.2                                 | 44.0                                                 | 19.4                  | 52.8%      | 0.211                               | <i>n.a.</i>                             |
|         |              | 51.5   | 20     | 3.98            | 6.23              | 5.81              | 93.7                                 | 60.9                                                 | 12.9                  | 35.0%      | 0.140                               | <i>n.a.</i>                             |
|         |              | 50.1   | 20     | 6.20            | 6.70              | 6.71              | 93.3                                 | 66.8                                                 | 10.7                  | 28.4%      | 0.117                               | <i>n.a.</i>                             |
|         |              | 50.1   | 20     | 8.11            | 8.35              | 8.07              | 94.6                                 | 79.3                                                 | 6.2                   | 16.2%      | 0.068                               | <i>n.a.</i>                             |
| Comp    | 2.28%        | 49.6   | 20     | 2.22            | <i>n.a.</i>       | 2.26              | 98.4                                 | 79.8                                                 | 7.7                   | 18.9%      | 0.019                               | 5.19                                    |
|         |              | 50.5   | 20     | 3.20            | <i>n.a.</i>       | 3.49              | 101.7                                | 86.9                                                 | 6.0                   | 14.6%      | 0.015                               | 7.36                                    |
|         |              | 50.0   | 20     | 4.22            | <i>n.a.</i>       | 6.30              | 103.9                                | 92.0                                                 | 4.9                   | 11.4%      | 0.012                               | 20.35                                   |
|         |              | 50.6   | 20     | 6.15            | <i>n.a.</i>       | 5.08              | 101.0                                | 93.2                                                 | 3.1                   | 7.7%       | 0.008                               | 32.19                                   |
|         |              | 51.1   | 20     | 8.07            | <i>n.a.</i>       | 7.10              | 101.3                                | 95.2                                                 | 2.5                   | 6.1%       | 0.006                               | 46.60                                   |

pH<sub>0</sub> is the pH of the solution before contact with the sorbent. pH<sub>int</sub> is the pH of the solution immediately after contact with the sorbent. pH<sub>fin</sub> is the pH of the solution after adsorption test and separation of the sorbent from the liquid. C<sub>0</sub> is the initial arsenic concentration. C<sub>e</sub> is the final arsenic concentration. q<sub>e</sub> is the adsorbed amount of arsenic, calculated with Eq.1. Relative errors (E<sub>r</sub>): E<sub>r</sub>(Moisture) = 2%; E<sub>r</sub>(m) = 1%; E<sub>r</sub>(V) = 1%; E<sub>r</sub>(pH) = 2%; E<sub>r</sub>(C) = 2%; E<sub>r</sub>(q<sub>e</sub>) = 7%.



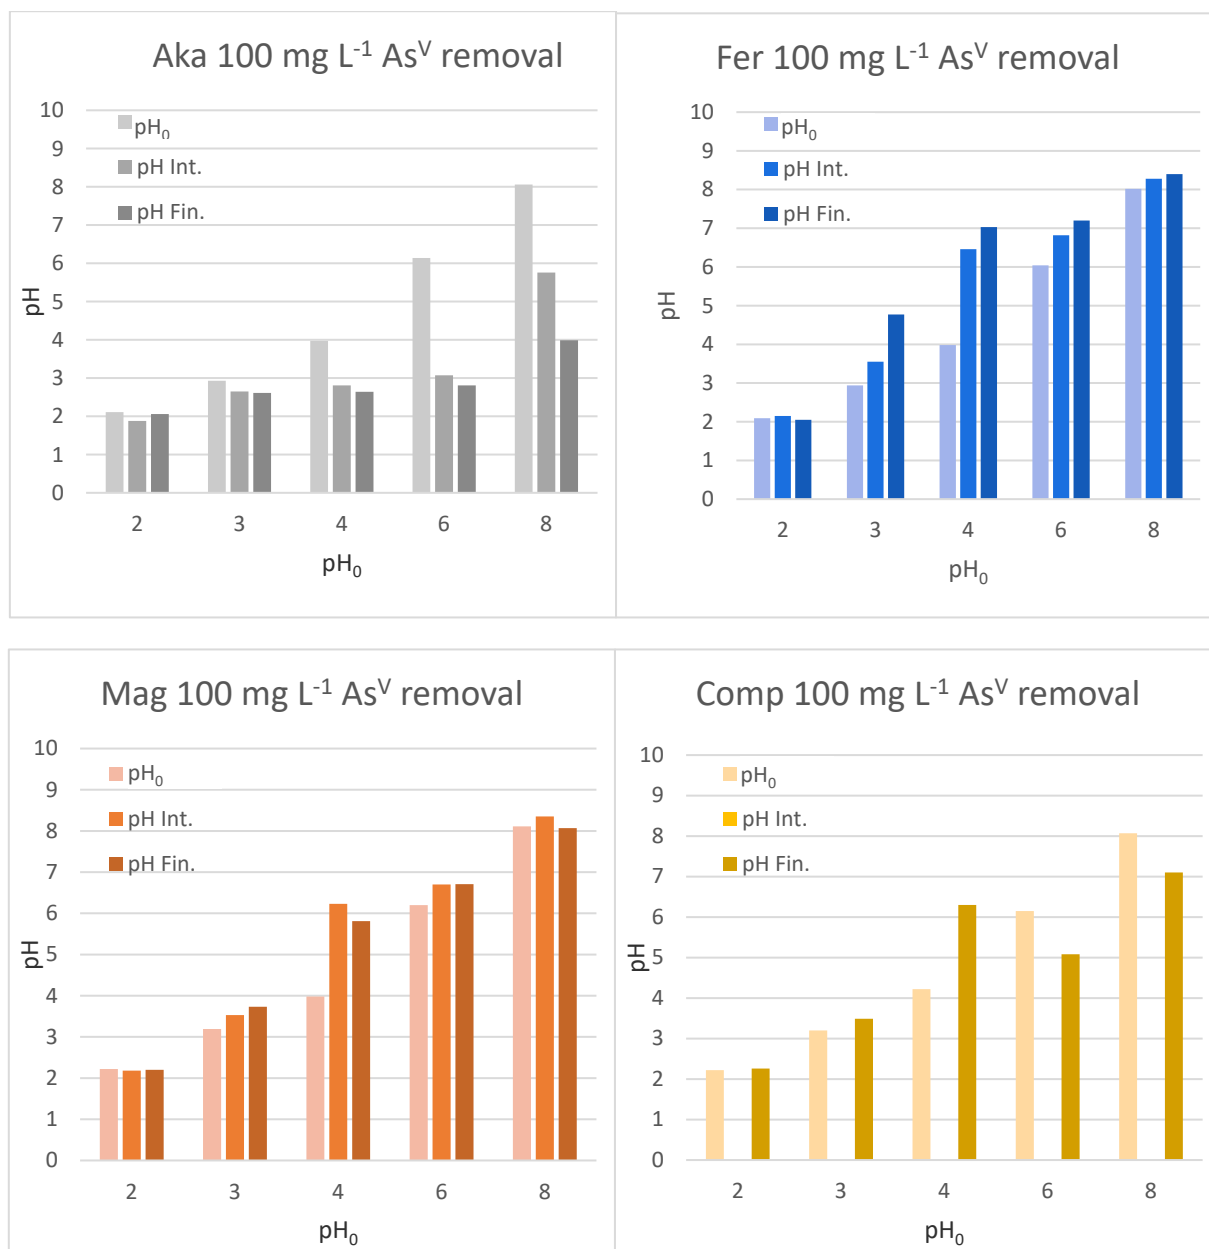

**Figure S9.** Evolution of initial pH (pH<sub>0</sub>), intermediate pH (pH<sub>Int</sub>) and final pH (pH<sub>Fin</sub>) for various starting pH (pH<sub>0</sub>) for the sorbents with initial concentration of As<sup>V</sup> equal to 100 mg L<sup>-1</sup>.

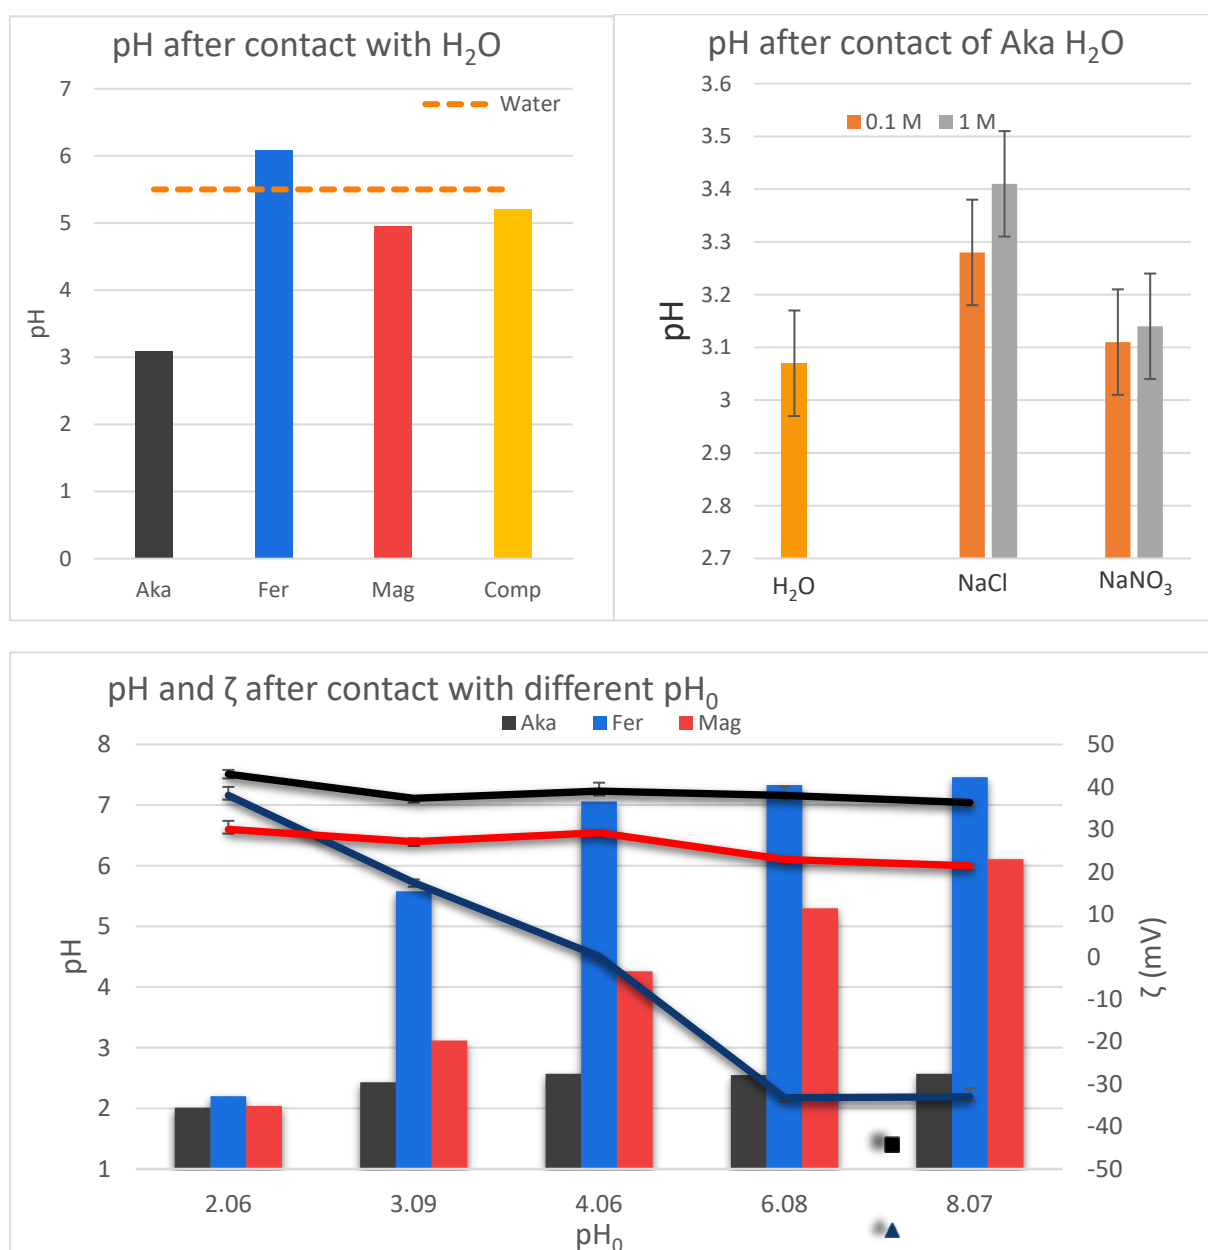

**Figure S10.** pH of solution after contact with sorbents.

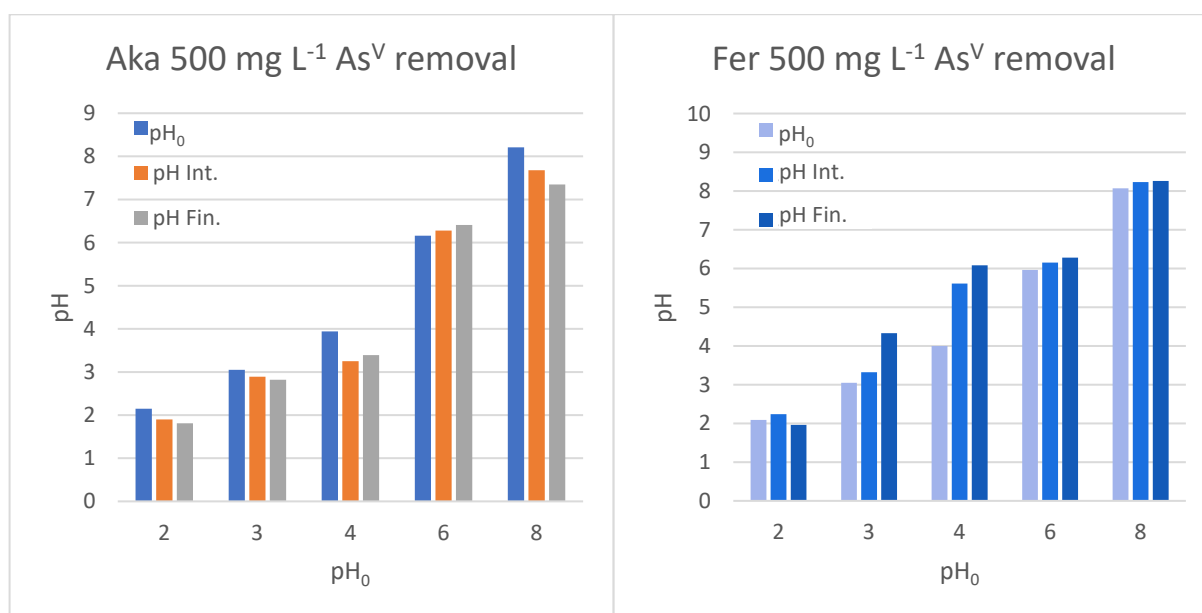

**Figure S11.** Evolution of initial pH (pH<sub>0</sub>), intermediate pH (pH<sub>Int</sub>) and final pH (pH<sub>Fin</sub>) for various starting pH (pH<sub>0</sub>) for the sorbents with initial concentration of As<sup>V</sup> equal to 500 mg L<sup>-1</sup>.

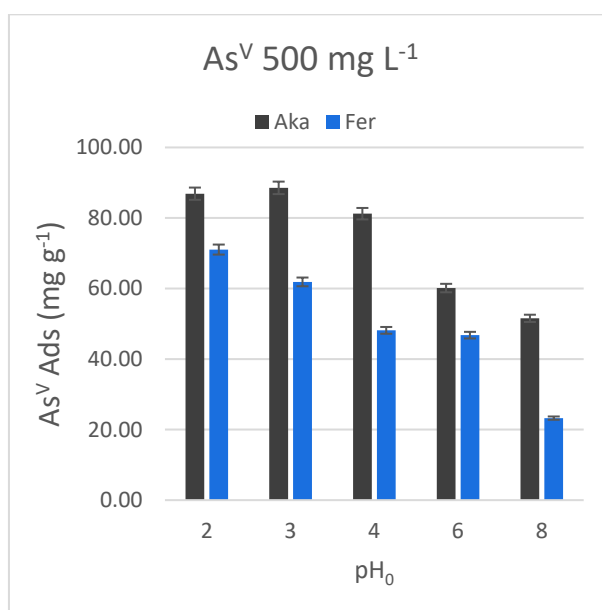

**Figure S12.** Adsorption capacity from batch adsorption experiments with 500 mg L<sup>-1</sup> As<sup>V</sup> solution on Aka (black) and Fer (blue) at different initial pH (pH<sub>0</sub>).

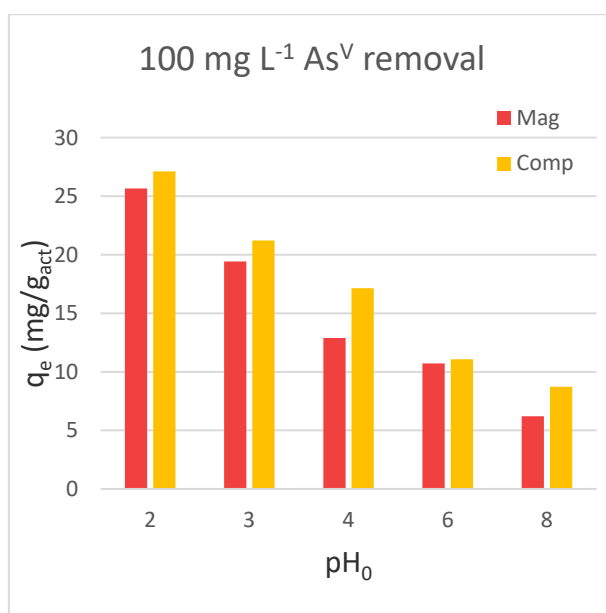

**Figure S13.** Adsorption capacity from batch adsorption experiments with 100 mg L<sup>-1</sup> As<sup>V</sup> solution on maghemite and composite normalized for its active phase (28.3%) at different initial pH (pH<sub>0</sub>).

### 5. Adsorption tests: effect of pH As<sup>III</sup>

**Table S5.** Batch experiments results of the sorbents at initial concentration of 100 or 500 mg L<sup>-1</sup> of As<sup>III</sup> at various pH. Volume of the contaminant was 20 mL and adsorption time was 16 hours.

| Sorbent | Moisture (%) | m (mg) | V (mL) | pH <sub>0</sub> | pH <sub>Int</sub> | pH <sub>Fin</sub> | C <sub>0</sub> (mg L <sup>-1</sup> ) | C <sub>e</sub> As <sup>III</sup> (mg L <sup>-1</sup> ) | q <sub>e</sub> (mg/g) | As Ads (%) | q <sub>e</sub> (mg/m <sup>2</sup> ) | C <sub>e</sub> Si (mg L <sup>-1</sup> ) |
|---------|--------------|--------|--------|-----------------|-------------------|-------------------|--------------------------------------|--------------------------------------------------------|-----------------------|------------|-------------------------------------|-----------------------------------------|
| Aka     | 7.24%        | 49.8   | 20     | 2.12            | 1.78              | 1.72              | 102.6                                | 37.2                                                   | 28.3                  | 63.8%      | 0.140                               | <i>n.a.</i>                             |
|         |              | 50.8   | 20     | 3.06            | 2.72              | 2.61              | 103.9                                | 19.5                                                   | 35.8                  | 81.2%      | 0.177                               | <i>n.a.</i>                             |
|         |              | 49.3   | 20     | 4.13            | 2.86              | 2.68              | 103.9                                | 18.4                                                   | 37.4                  | 82.3%      | 0.185                               | <i>n.a.</i>                             |
|         |              | 49.4   | 20     | 6.05            | 2.91              | 2.89              | 103.1                                | 20.8                                                   | 35.9                  | 79.8%      | 0.178                               | <i>n.a.</i>                             |
|         |              | 50.8   | 20     | 8.04            | 2.95              | 2.90              | 102.9                                | 17.0                                                   | 36.4                  | 83.4%      | 0.180                               | <i>n.a.</i>                             |
|         |              | 46.6   | 20     | 2.04            | 2.06              | 2.07              | 518.3                                | 364.9                                                  | 65.9                  | 29.6%      | 0.326                               | <i>n.a.</i>                             |
|         |              | 46.6   | 20     | 2.97            | 2.99              | 2.49              | 567.1                                | 355.8                                                  | 90.7                  | 37.3%      | 0.449                               | <i>n.a.</i>                             |
|         |              | 46.8   | 20     | 4.09            | 3.14              | 2.63              | 549.5                                | 351.1                                                  | 84.8                  | 36.1%      | 0.420                               | <i>n.a.</i>                             |
|         |              | 46.8   | 20     | 6.05            | 3.06              | 2.43              | 564.6                                | 352.9                                                  | 90.5                  | 37.5%      | 0.448                               | <i>n.a.</i>                             |
|         |              | 46.7   | 20     | 7.98            | 3.33              | 2.56              | 570.6                                | 356.9                                                  | 91.4                  | 37.5%      | 0.453                               | <i>n.a.</i>                             |
| Fer     | 10.67%       | 45.0   | 20     | 2.10            | 2.14              | 2.20              | 115.8                                | 14.5                                                   | 45.1                  | 87.5%      | 0.173                               | <i>n.a.</i>                             |
|         |              | 45.2   | 20     | 2.99            | 3.25              | 3.17              | 119.8                                | 7.1                                                    | 49.9                  | 94.1%      | 0.192                               | <i>n.a.</i>                             |
|         |              | 44.7   | 20     | 4.08            | 5.03              | 5.05              | 119.7                                | 5.1                                                    | 51.2                  | 95.7%      | 0.197                               | <i>n.a.</i>                             |
|         |              | 44.8   | 20     | 6.01            | 6.12              | 5.91              | 119.3                                | 4.5                                                    | 51.3                  | 96.2%      | 0.197                               | <i>n.a.</i>                             |
|         |              | 45.5   | 20     | 8.05            | 6.83              | 6.65              | 119.2                                | 4.3                                                    | 50.6                  | 96.4%      | 0.194                               | <i>n.a.</i>                             |
|         |              | 50.37  | 20     | 2.07            | 2.16              | 1.89              | 544.2                                | 293.0                                                  | 111.7                 | 46.2%      | 0.429                               | <i>n.a.</i>                             |
|         |              | 50.19  | 20     | 2.97            | 3.47              | 3.08              | 567.1                                | 260.6                                                  | 136.7                 | 54.0%      | 0.526                               | <i>n.a.</i>                             |
|         |              | 50.33  | 20     | 4.09            | 5.20              | 4.78              | 549.5                                | 248.6                                                  | 133.9                 | 54.8%      | 0.515                               | <i>n.a.</i>                             |
|         |              | 50.30  | 20     | 6.05            | 6.16              | 5.78              | 564.6                                | 248.4                                                  | 140.7                 | 56.0%      | 0.541                               | <i>n.a.</i>                             |
|         |              | 50.37  | 20     | 7.98            | 7.45              | 6.77              | 570.6                                | 245.8                                                  | 144.4                 | 56.9%      | 0.555                               | <i>n.a.</i>                             |
| Mag     | 1.31%        | 52.0   | 20     | 2.14            | 2.15              | 1.92              | 99.5                                 | 57.8                                                   | 16.3                  | 41.9%      | 0.177                               | <i>n.a.</i>                             |
|         |              | 51.5   | 20     | 3.15            | 3.09              | 2.90              | 98.7                                 | 48.9                                                   | 19.6                  | 50.4%      | 0.213                               | <i>n.a.</i>                             |
|         |              | 50.0   | 20     | 3.99            | 4.17              | 5.09              | 98.1                                 | 45.1                                                   | 21.5                  | 54.1%      | 0.234                               | <i>n.a.</i>                             |
|         |              | 50.3   | 20     | 6.16            | 5.88              | 7.11              | 97.8                                 | 44.2                                                   | 21.6                  | 54.9%      | 0.235                               | <i>n.a.</i>                             |
|         |              | 50.8   | 20     | 8.02            | 6.77              | 7.68              | 98.6                                 | 41.2                                                   | 22.9                  | 58.2%      | 0.249                               | <i>n.a.</i>                             |
| Comp    | 2.28%        | 50.8   | 20     | 2.18            | 1.97              | 2.20              | 97.7                                 | 93.3                                                   | 1.8                   | 4.5%       | 0.004                               | 4.39                                    |
|         |              | 51.0   | 20     | 3.24            | 3.30              | 3.51              | 101.3                                | 95.0                                                   | 2.5                   | 6.1%       | 0.006                               | 5.56                                    |
|         |              | 49.7   | 20     | 3.97            | 4.00              | 4.99              | 106.1                                | 93.3                                                   | 5.3                   | 12.1%      | 0.013                               | 7.42                                    |
|         |              | 50.6   | 20     | 5.89            | 5.76              | 6.92              | 99.7                                 | 91.2                                                   | 3.4                   | 8.5%       | 0.008                               | 12.78                                   |
|         |              | 49.7   | 20     | 8.01            | 7.25              | 7.56              | 98.3                                 | 90.1                                                   | 3.4                   | 8.3%       | 0.008                               | 28.59                                   |

pH<sub>0</sub> is the pH of the solution before contact with the sorbent. pH<sub>Int</sub> is the pH of the solution immediately after contact with the sorbent. pH<sub>Fin</sub> is the pH of the solution after adsorption test and separation of the sorbent from the liquid. C<sub>0</sub> is the initial arsenic concentration. C<sub>e</sub> is the final arsenic concentration. q<sub>e</sub> is the adsorbed amount of arsenic, calculated with Eq.1. Relative errors (E<sub>r</sub>): E<sub>r</sub>(Moisture) = 2%; E<sub>r</sub>(m) = 1%; E<sub>r</sub>(V) = 1%; E<sub>r</sub>(pH) = 2%; E<sub>r</sub>(C) = 2%; E<sub>r</sub>(q<sub>e</sub>) = 7%.

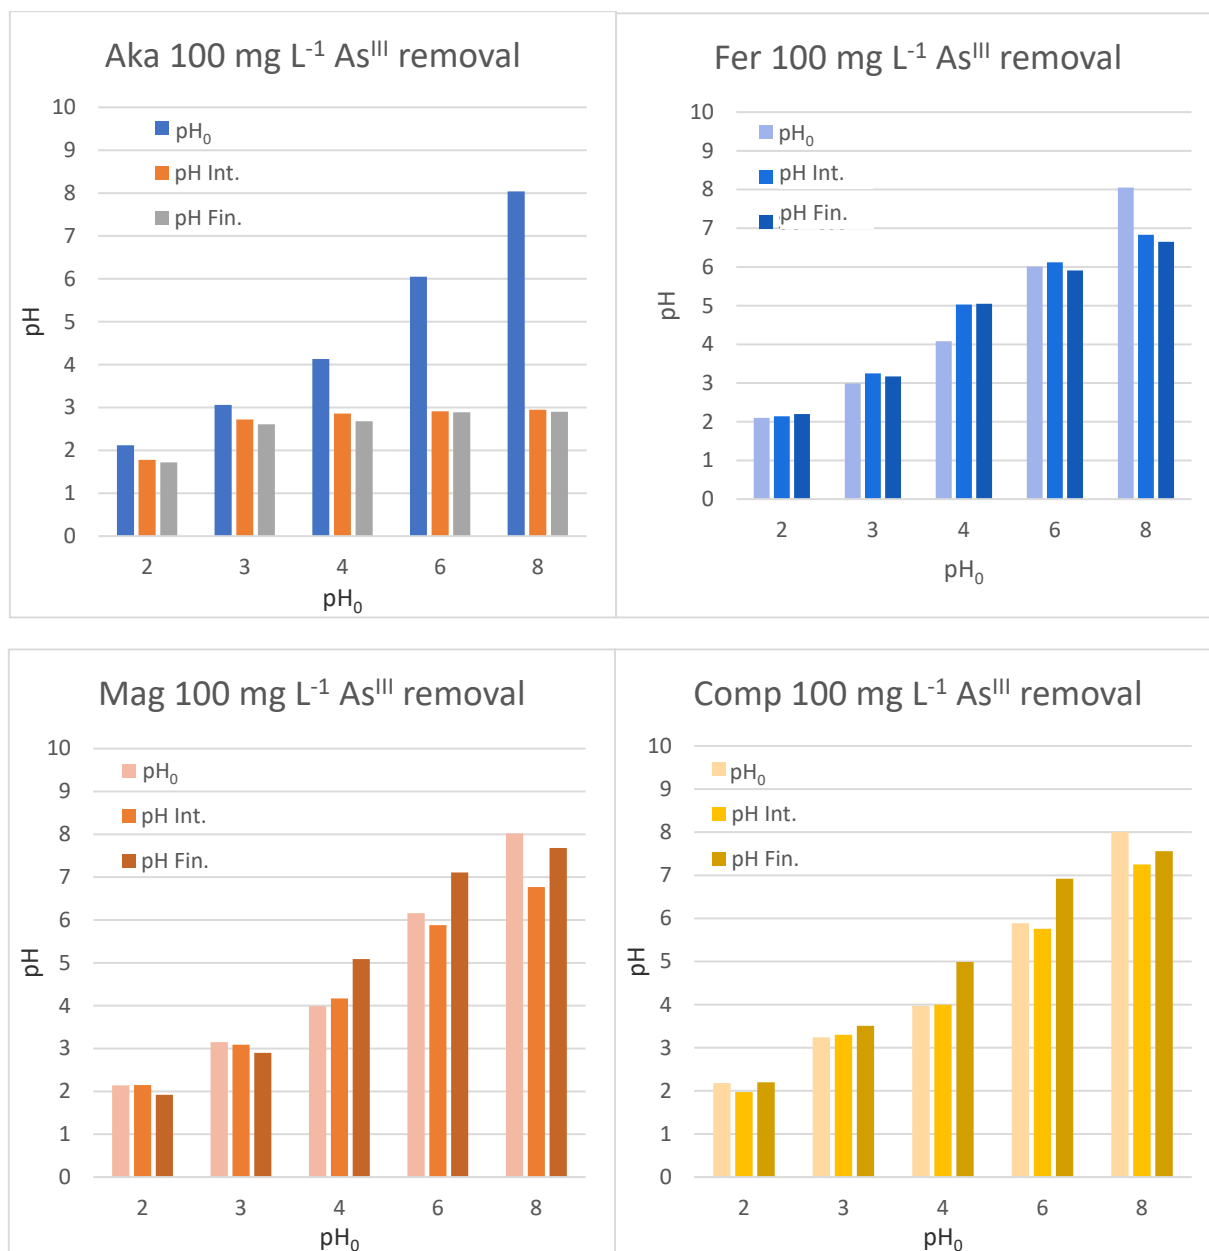

**Figure S14.** Evolution of initial pH ( $\text{pH}_0$ ), intermediate pH ( $\text{pH}_{\text{Int}}$ ) and final pH ( $\text{pH}_{\text{Fin}}$ ) for various starting pH ( $\text{pH}_0$ ) for the sorbents with initial concentration of  $\text{As}^{\text{III}}$  equal to  $100 \text{ mg L}^{-1}$ .



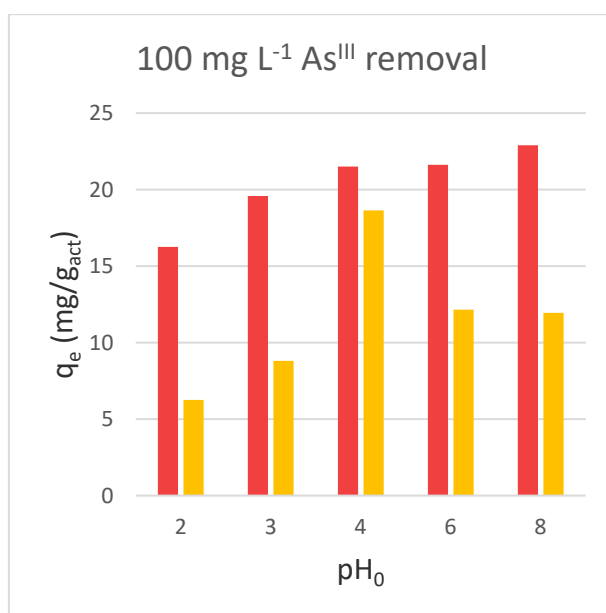

**Figure S15.** Adsorption capacity from batch adsorption experiments with 100 mg L<sup>-1</sup> As<sup>III</sup> solution on maghemite and composite normalized for its active phase (28.3%) at different initial pH (pH<sub>0</sub>).

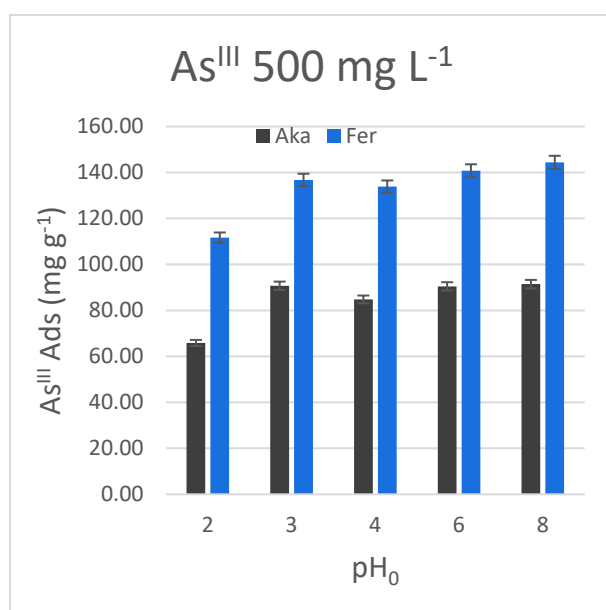

**Figure S16.** Adsorption capacity from batch adsorption experiments with 500 mg L<sup>-1</sup> As<sup>III</sup> solution on Aka (black) and Fer (blue) at different initial pH (pH<sub>0</sub>).

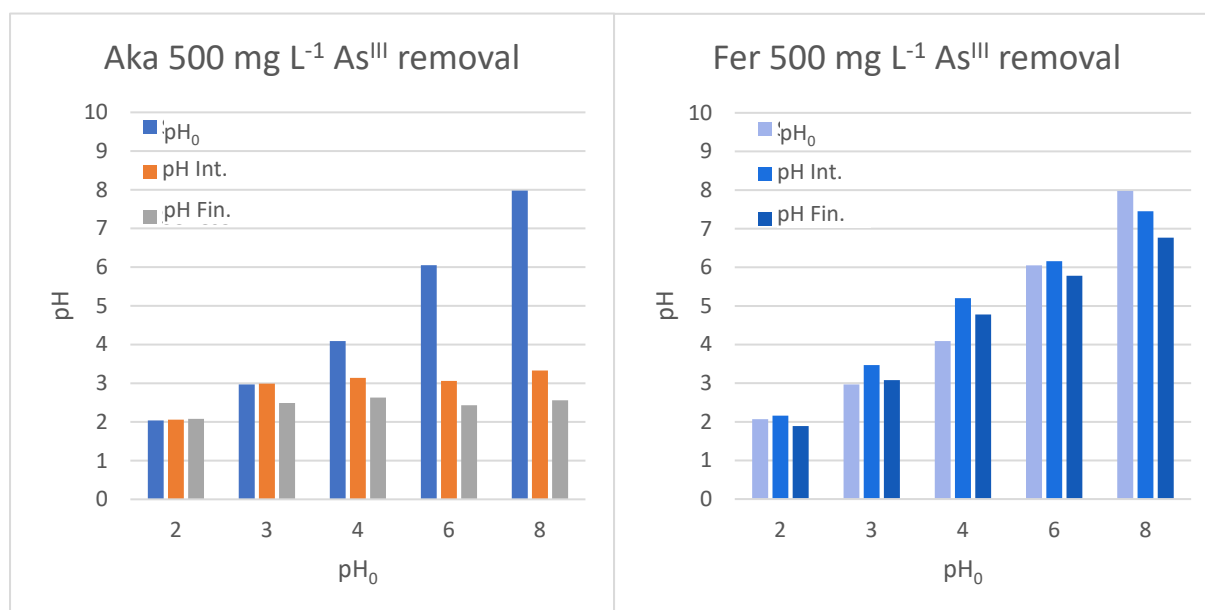

**Figure S17.** Evolution of initial pH (pH<sub>0</sub>), intermediate pH (pH<sub>Int</sub>) and final pH (pH<sub>Fin</sub>) for various starting pH (pH<sub>0</sub>) for the sorbents with initial concentration of As<sup>III</sup> equal to 500 mg L<sup>-1</sup>.

## 6. FTIR Spectra

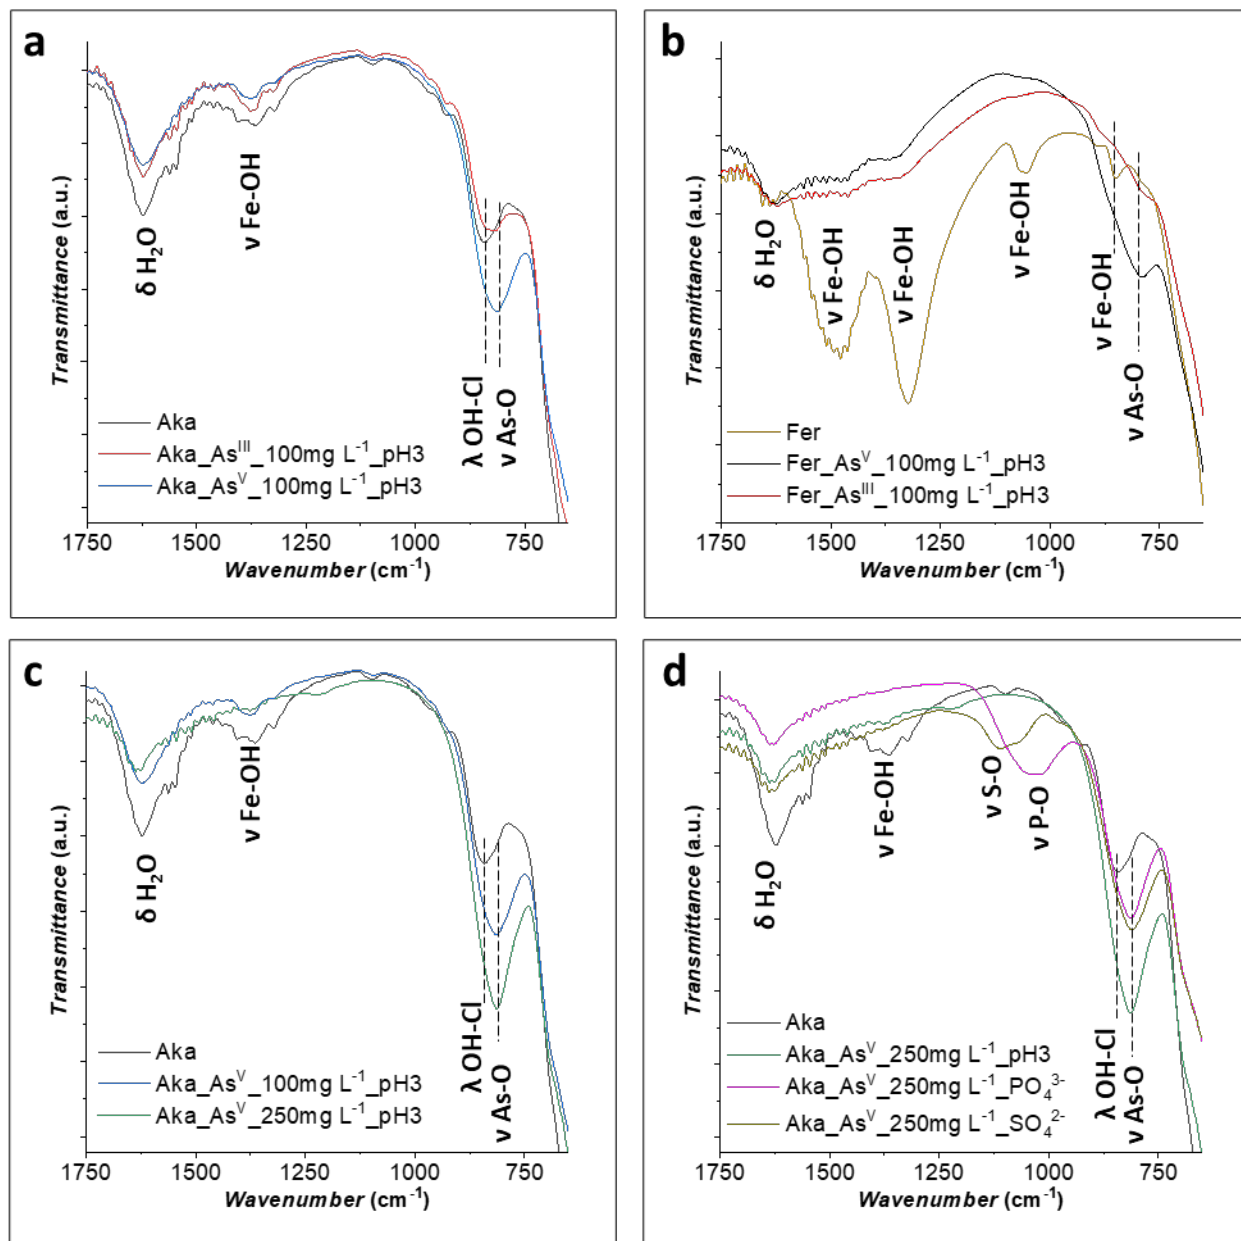

Figure S18. FTIR spectra of akaganeite and ferrihydrite after arsenic removal.

## 7. Adsorption tests: effect of initial concentration

**Table S6.** Batch experiments results of the sorbents at various initial concentration of of As<sup>V</sup> at pH 3 and 8. Volume of the contaminant was 20 mL and adsorption time was 16 hours.

| Sorbent | Moisture (%) | m (mg) | V (mL) | pH <sub>0</sub> | pH <sub>Int</sub> | pH <sub>Fin</sub> | C <sub>0</sub> (mg L <sup>-1</sup> ) | C <sub>e</sub> As <sup>V</sup> (mg L <sup>-1</sup> ) | q <sub>e</sub> (mg g <sup>-1</sup> ) | As Ads (%) | q <sub>e</sub> (mg m <sup>-2</sup> ) |
|---------|--------------|--------|--------|-----------------|-------------------|-------------------|--------------------------------------|------------------------------------------------------|--------------------------------------|------------|--------------------------------------|
| Aka     | 7.24%        | 49.9   | 20     | 2.99            | 2.52              | 2.59              | 10.0                                 | 0.0                                                  | 4.3                                  | 99.7%      | 0.021                                |
|         |              | 50     | 20     | 3.13            | 2.82              | 2.65              | 46.8                                 | 0.0                                                  | 20.2                                 | 99.9%      | 0.100                                |
|         |              | 49.2   | 20     | 2.93            | 2.65              | 2.61              | 95.5                                 | 0.2                                                  | 41.8                                 | 99.8%      | 0.207                                |
|         |              | 49.5   | 20     | 3.12            | 2.69              | 2.68              | 145.3                                | 3.9                                                  | 61.6                                 | 97.3%      | 0.305                                |
|         |              | 51.5   | 20     | 3.01            | 2.77              | 2.67              | 205.9                                | 20.8                                                 | 77.5                                 | 89.9%      | 0.384                                |
|         |              | 50.3   | 20     | 2.95            | 2.63              | 2.84              | 255.6                                | 74.7                                                 | 77.5                                 | 70.8%      | 0.384                                |
|         |              | 51.4   | 20     | 3.03            | 2.81              | 2.79              | 363.0                                | 151.4                                                | 88.8                                 | 58.3%      | 0.439                                |
|         |              | 49.8   | 20     | 3.05            | 2.89              | 2.82              | 484.2                                | 279.7                                                | 88.5                                 | 42.2%      | 0.438                                |
|         |              | 51.1   | 20     | 7.94            | 2.76              | 2.63              | 9.9                                  | 0.1                                                  | 4.2                                  | 99.4%      | 0.021                                |
|         |              | 51.1   | 20     | 8.03            | 3.09              | 2.84              | 45.7                                 | 0.1                                                  | 19.3                                 | 99.9%      | 0.095                                |
|         |              | 49.8   | 20     | 8.06            | 5.76              | 3.99              | 98.4                                 | 0.8                                                  | 42.3                                 | 99.2%      | 0.209                                |
|         |              | 51.2   | 20     | 8.14            | 6.53              | 5.53              | 142.4                                | 31.3                                                 | 46.8                                 | 78.0%      | 0.232                                |
|         |              | 49.9   | 20     | 8.01            | 6.72              | 6.38              | 212.8                                | 104.5                                                | 46.8                                 | 50.9%      | 0.232                                |
|         |              | 49.9   | 20     | 8.17            | 7.32              | 6.91              | 242.1                                | 130.3                                                | 48.3                                 | 46.2%      | 0.239                                |
|         |              | 50.4   | 20     | 8.04            | 7.12              | 6.97              | 376.8                                | 264.8                                                | 47.9                                 | 29.7%      | 0.237                                |
|         |              | 50.3   | 20     | 8.21            | 7.68              | 7.35              | 455.3                                | 335.1                                                | 51.5                                 | 26.4%      | 0.255                                |

pH<sub>0</sub> is the pH of the solution before contact with the sorbent. pH<sub>Int</sub> is the pH of the solution immediately after contact with the sorbent. pH<sub>Fin</sub> is the pH of the solution after adsorption test and separation of the sorbent from the liquid. C<sub>0</sub> is the initial arsenic concentration. C<sub>e</sub> is the final arsenic concentration. q<sub>e</sub> is the adsorbed amount of arsenic, calculated with Eq.1. Relative errors (E<sub>r</sub>): E<sub>r</sub>(Moisture) = 2%; E<sub>r</sub>(m) = 1%; E<sub>r</sub>(V) = 1%; E<sub>r</sub>(pH) = 2%; E<sub>r</sub>(C) = 2%; E<sub>r</sub>(q<sub>e</sub>) = 7%.

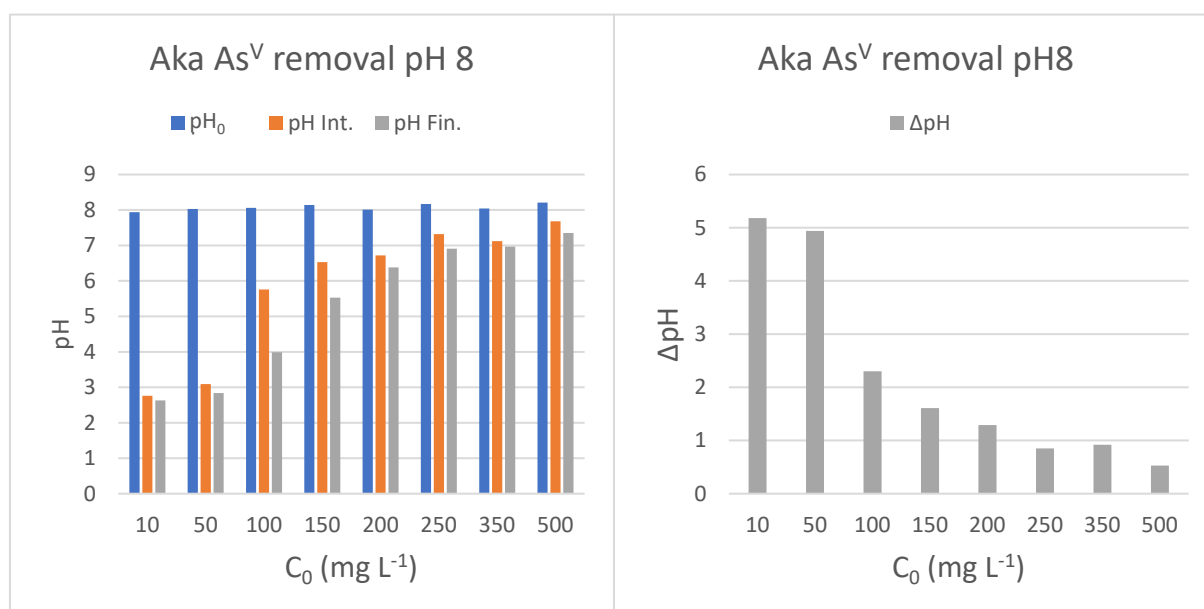

**Figure S19.** Evolution of initial pH (pH<sub>0</sub>), intermediate pH (pH<sub>Int</sub>) and final pH (pH<sub>Fin</sub>) (left) and ΔpH between intermediate and initial pH (right) at various As<sup>V</sup> initial concentration for Aka.

### 8. Adsorption tests: effect of contact time

**Table S7.** Batch experiments results of the sorbents at various contact time with As<sup>V</sup> at pH 3 and 8. Volume of the contaminant was 20 mL initial concentration of about 250 mg L<sup>-1</sup>.

| Sorbent | Moisture (%) | m (mg) | V (mL) | t (min) | pH <sub>0</sub> | pH <sub>Fin.</sub> | C <sub>0</sub> (mg L <sup>-1</sup> ) | C <sub>e</sub> As <sup>V</sup> (mg L <sup>-1</sup> ) | q <sub>e</sub> (mg g <sup>-1</sup> ) | As Ads (%) | q <sub>e</sub> (mg m <sup>-2</sup> ) |
|---------|--------------|--------|--------|---------|-----------------|--------------------|--------------------------------------|------------------------------------------------------|--------------------------------------|------------|--------------------------------------|
| Aka     | 7.24%        | 50.0   | 20     | 10      | 3.14            | 3.15               | 269.8                                | 126.6                                                | 61.7                                 | 53.1%      | 0.306                                |
|         |              | 50.2   | 20     | 30      | 3.14            | 3.26               | 269.8                                | 111.5                                                | 68.0                                 | 58.7%      | 0.337                                |
|         |              | 49.5   | 20     | 60      | 3.14            | 3.22               | 269.8                                | 112.6                                                | 68.5                                 | 58.3%      | 0.339                                |
|         |              | 50.1   | 20     | 120     | 3.14            | 2.78               | 269.8                                | 100.9                                                | 72.7                                 | 62.6%      | 0.360                                |
|         |              | 50.6   | 20     | 240     | 3.14            | 2.90               | 269.8                                | 96.1                                                 | 74.0                                 | 64.4%      | 0.367                                |
|         |              | 50.3   | 20     | 960     | 3.14            | 2.81               | 255.6                                | 74.7                                                 | 77.5                                 | 70.8%      | 0.384                                |
|         |              | 50.2   | 20     | 10      | 7.97            | 6.79               | 263.6                                | 173.7                                                | 38.6                                 | 34.1%      | 0.191                                |
|         |              | 50.7   | 20     | 30      | 7.97            | 6.72               | 263.6                                | 164.0                                                | 42.3                                 | 37.8%      | 0.210                                |
|         |              | 50.3   | 20     | 60      | 7.97            | 6.81               | 263.6                                | 158.7                                                | 45.0                                 | 39.8%      | 0.223                                |
|         |              | 50.7   | 20     | 120     | 7.97            | 6.60               | 263.6                                | 166.6                                                | 41.2                                 | 36.8%      | 0.204                                |
|         |              | 49.6   | 20     | 240     | 7.97            | 6.50               | 263.6                                | 148.5                                                | 50.0                                 | 43.7%      | 0.248                                |
|         |              | 49.9   | 20     | 960     | 8.17            | 6.91               | 242.1                                | 130.3                                                | 48.3                                 | 46.2%      | 0.239                                |

pH<sub>0</sub> is the pH of the solution before contact with the sorbent. pH<sub>Fin.</sub> is the pH of the solution after adsorption test and separation of the sorbent from the liquid. C<sub>0</sub> is the initial arsenic concentration. C<sub>e</sub> is the final arsenic concentration. q<sub>i</sub> is the adsorbed amount of arsenic at a certain time, calculated with Eq.8. Relative errors (E<sub>r</sub>): E<sub>r</sub>(Moisture) = 2%; E<sub>r</sub>(m) = 1%; E<sub>r</sub>(V) = 1%; E<sub>r</sub>(pH) = 2%; E<sub>r</sub>(C) = 2%; E<sub>r</sub>(q<sub>e</sub>) = 7%.

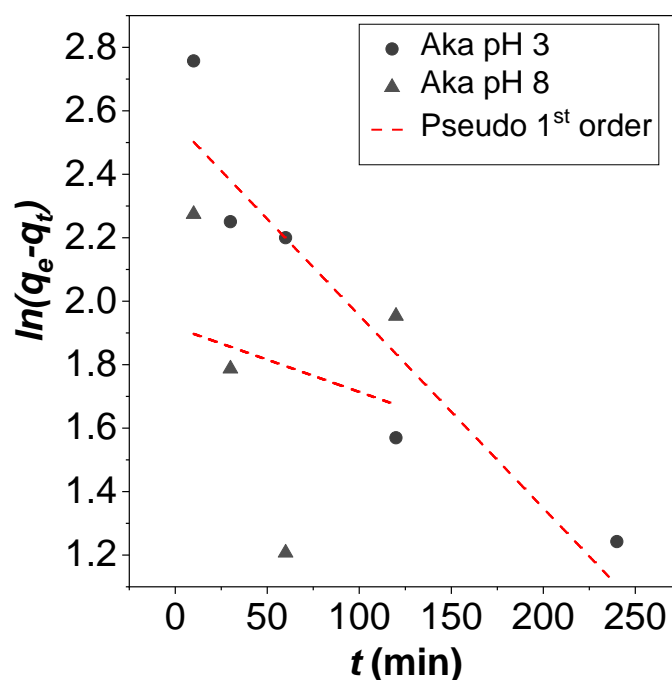

**Figure S20.** Sorption kinetics of As<sup>V</sup> on Aka at pH 3 and 8 fitted by linearized pseudo 1<sup>st</sup> order fitting.

**Table S8.** Linear pseudo 2<sup>nd</sup> order and intraparticle diffusion models fitting parameters for adsorption of As<sup>V</sup> onto Aka at pH<sub>0</sub> 3 and 8.

| Sample | pH <sub>0</sub> | $q_e^{\text{exp}}$ (mg g <sup>-1</sup> ) | $q_e^{\text{calc}}$ (mg g <sup>-1</sup> ) | $K''$ (g mg <sup>-1</sup> min <sup>-1</sup> ) | R <sup>2</sup> | $k_i$ (g mg <sup>-1</sup> min <sup>-0.5</sup> ) | $x_i$ (mg g <sup>-1</sup> ) | R <sup>2</sup> |
|--------|-----------------|------------------------------------------|-------------------------------------------|-----------------------------------------------|----------------|-------------------------------------------------|-----------------------------|----------------|
| Aka    | 3               | 78(5)                                    | 78.0(4)                                   | 1.8(5)·10 <sup>-3</sup>                       | 0.99           | 1.5(7);<br>0.24(1)                              | 58(4);<br>70.2(3)           | 0.81; 0.99     |
|        | 8               | 48(3)                                    | 48.7(6)                                   | 4(3)·10 <sup>-3</sup>                         | 0.99           | 1.4(1);<br>0.2(4)                               | 34.3(8);<br>42(8)           | 0.99; 0.28     |



### 9. Adsorption tests: effect of ionic strength

**Table S9.** Batch experiments results of the sorbents at different ionic strength with As<sup>V</sup> at pH 3 and 8. Volume of the contaminant was 20 mL initial concentration of about 250 mg L<sup>-1</sup>. pH<sub>0</sub> is the pH of the solution before contact with the sorbent.

| Sorbent | Moisture (%) | m (mg) | V (mL) | NaCl (M) | pH <sub>0</sub> | pH <sub>Int</sub> | pH <sub>Fin</sub> | C <sub>0</sub> As <sup>V</sup> (mg L <sup>-1</sup> ) | C <sub>e</sub> As <sup>V</sup> (mg L <sup>-1</sup> ) | q <sub>e</sub> (mg g <sup>-1</sup> ) | As Ads (%) | q <sub>e</sub> (mg m <sup>-2</sup> ) |
|---------|--------------|--------|--------|----------|-----------------|-------------------|-------------------|------------------------------------------------------|------------------------------------------------------|--------------------------------------|------------|--------------------------------------|
| Aka     | 7.24%        | 50.3   | 20     | 0        | 3.14            | 2.83              | 2.81              | 255.6                                                | 74.7                                                 | 77.5                                 | 70.8%      | 0.384                                |
|         |              | 50.7   | 20     | 0.01     | 3.01            | 2.8               | 3.06              | 262.9                                                | 89.0                                                 | 74.0                                 | 66.2%      | 0.366                                |
|         |              | 50.3   | 20     | 0.1      | 3.12            | 2.89              | 2.95              | 256.7                                                | 86.0                                                 | 73.2                                 | 66.5%      | 0.362                                |
|         |              | 50.5   | 20     | 1        | 3.16            | 2.98              | 2.86              | 284.6                                                | 120.1                                                | 70.3                                 | 57.8%      | 0.348                                |
|         |              | 49.9   | 20     | 0        | 8.17            | 7.32              | 6.91              | 242.1                                                | 130.3                                                | 48.3                                 | 46.2%      | 0.239                                |
|         |              | 50.7   | 20     | 0.01     | 8.12            | 6.88              | 6.57              | 260.4                                                | 138.6                                                | 51.8                                 | 46.8%      | 0.257                                |
|         |              | 49.7   | 20     | 0.1      | 7.98            | 6.98              | 7.02              | 252.7                                                | 126.3                                                | 54.8                                 | 50.0%      | 0.272                                |
|         |              | 50.7   | 20     | 1        | 8.08            | 7.09              | 6.64              | 299.7                                                | 153.3                                                | 62.3                                 | 48.9%      | 0.308                                |

pH<sub>fin</sub> is the pH of the solution after adsorption test and separation of the sorbent from the liquid. C<sub>0</sub> is the initial arsenic concentration. C<sub>e</sub> is the final arsenic concentration. q<sub>e</sub> is the adsorbed amount of arsenic at a certain time, calculated with Eq.1. Relative errors (E<sub>r</sub>): E<sub>r</sub>(Moisture) = 2%; E<sub>r</sub>(m) = 1%; E<sub>r</sub>(V) = 1%; E<sub>r</sub>(pH) = 2%; E<sub>r</sub>(C) = 2%; E<sub>r</sub>(q<sub>e</sub>) = 7%.

### 10. Adsorption tests: effect of competitors

**Table S10.** Batch experiments results of the sorbents at different sulfate competitor concentration with As<sup>V</sup> at pH 3 and 8. Volume of the contaminant was 20 mL initial concentration of about 250 mg L<sup>-1</sup>.

| Sorbent | Moisture (%) | M (mg) | V (mL) | SO <sub>4</sub> <sup>2-</sup> (M) | pH <sub>0</sub> | pH <sub>Int</sub> | pH <sub>Fin</sub> | C <sub>0</sub> (mg L <sup>-1</sup> ) | C <sub>e</sub> As <sup>V</sup> (mg L <sup>-1</sup> ) | q <sub>e</sub> (mg g <sup>-1</sup> ) | As Ads (%) | q <sub>e</sub> (mg m <sup>-2</sup> ) |
|---------|--------------|--------|--------|-----------------------------------|-----------------|-------------------|-------------------|--------------------------------------|------------------------------------------------------|--------------------------------------|------------|--------------------------------------|
| Aka     | 7.24%        | 50.3   | 20     | 0.00                              | 3.14            | 2.83              | 2.81              | 255.6                                | 74.7                                                 | 77.5                                 | 70.8%      | 0.384                                |
|         |              | 49.6   | 20     | 0.003                             | 3.11            | 3.2               | 2.92              | 259.2                                | 105.2                                                | 66.9                                 | 59.4%      | 0.331                                |
|         |              | 50.6   | 20     | 0.033                             | 3.04            | 3.12              | 2.62              | 274.9                                | 125.7                                                | 63.6                                 | 54.3%      | 0.315                                |
|         |              | 50.7   | 20     | 0.334                             | 3.15            | 3.18              | 2.76              | 252.8                                | 137.6                                                | 49.0                                 | 45.6%      | 0.243                                |
|         |              | 49.9   | 20     | 0.00                              | 8.17            | 7.32              | 6.91              | 242.1                                | 130.3                                                | 48.3                                 | 46.2%      | 0.239                                |
|         |              | 50.8   | 20     | 0.003                             | 8.07            | 7.09              | 6.49              | 260.9                                | 131.1                                                | 55.1                                 | 49.8%      | 0.273                                |
|         |              | 49.6   | 20     | 0.033                             | 7.94            | 7.1               | 6.55              | 267.8                                | 131.1                                                | 59.4                                 | 51.1%      | 0.294                                |
|         |              | 50.2   | 20     | 0.334                             | 7.97            | 7.38              | 6.51              | 273.8                                | 142.8                                                | 56.2                                 | 47.8%      | 0.278                                |

pH<sub>0</sub> is the pH of the solution before contact with the sorbent. pH<sub>fin</sub> is the pH of the solution after adsorption test and separation of the sorbent from the liquid. C<sub>0</sub> is the initial arsenic concentration. C<sub>e</sub> is the final arsenic concentration. q<sub>e</sub> is the adsorbed amount of arsenic at a certain time, calculated with Eq.1. Relative errors (Er): Er(Moisture) = 2%; Er(m) = 1%; Er(V) = 1%; Er(pH) = 2%; Er(C) = 2%; Er(q<sub>e</sub>) = 7%.

**Table S11.** Batch experiments results of the sorbents at different phosphate concentration with As<sup>V</sup> at pH 3 and 8. Volume of the contaminant was 20 mL initial concentration of about 250 mg L<sup>-1</sup>.

| Sorbent | Moisture (%) | m (mg) | V (mL) | PO <sub>4</sub> <sup>3-</sup> (M) | pH <sub>0</sub> | pH <sub>Int</sub> | pH <sub>Fin</sub> | C <sub>0</sub> (mg L <sup>-1</sup> ) | C <sub>e</sub> As <sup>V</sup> (mg L <sup>-1</sup> ) | q <sub>e</sub> (mg g <sup>-1</sup> ) | As Ads (%) | q <sub>e</sub> (mg m <sup>-2</sup> ) |
|---------|--------------|--------|--------|-----------------------------------|-----------------|-------------------|-------------------|--------------------------------------|------------------------------------------------------|--------------------------------------|------------|--------------------------------------|
| Aka     | 7.24%        | 50.3   | 20     | 0.00                              | 3.14            | 2.83              | 2.81              | 255.6                                | 74.7                                                 | 77.5                                 | 70.8%      | 0.384                                |
|         |              | 49.3   | 20     | 0.003                             | 3.16            | 2.83              | 2.99              | 264.2                                | 125.4                                                | 60.7                                 | 52.5%      | 0.301                                |
|         |              | 50.4   | 20     | 0.033                             | 3.16            | 3.01              | 3.36              | 251.8                                | 175.0                                                | 32.9                                 | 30.5%      | 0.163                                |
|         |              | 50.1   | 20     | 0.334                             | 3.15            | 3.27              | 3.43              | 166.6                                | 146.1                                                | 8.8                                  | 12.3%      | 0.044                                |
|         |              | 49.9   | 20     | 0.00                              | 8.17            | 7.32              | 6.91              | 242.1                                | 130.3                                                | 48.3                                 | 46.2%      | 0.239                                |
|         |              | 49.6   | 20     | 0.003                             | 7.96            | 7.27              | 7.15              | 267.6                                | 169.8                                                | 42.5                                 | 36.5%      | 0.210                                |
|         |              | 50.5   | 20     | 0.033                             | 8.09            | 7.91              | 7.98              | 262.4                                | 207.6                                                | 23.4                                 | 20.9%      | 0.116                                |
|         |              | 50.1   | 20     | 0.334                             | 8.06            | 8.11              | 8.18              | 201.1                                | 203.3                                                | 0.0                                  | 0.0%       | 0.000                                |

pH<sub>0</sub> is the pH of the solution before contact with the sorbent. pH<sub>fin</sub> is the pH of the solution after adsorption test and separation of the sorbent from the liquid. C<sub>0</sub> is the initial arsenic concentration. C<sub>e</sub> is the final arsenic concentration. q<sub>e</sub> is the adsorbed amount of arsenic at a certain time, calculated with Eq.1. Relative errors (Er): Er(Moisture) = 2%; Er(m) = 1%; Er(V) = 1%; Er(pH) = 2%; Er(C) = 2%; Er(q<sub>e</sub>) = 7%.
